# Supplementary material for: Neutrophil extracellular traps arm DC vaccination against NPM-mutant myeloproliferation
Source: eLife. 2022 Apr 26;11:e69257. doi: 10.7554/eLife.69257 (PMC9068207; doi:10.7554/eLife.69257)
Supplement: Figure 1—source data 1. [file elife-69257-fig1-data1.xlsx]

## Sheet: Foglio1
Average NPMc fluorescent Area (% of cellularity)
	CTRL	WT NET (CT135)	NPMc+ NET (CT136)
	21.1	59.3	8.32
	19.8	53.3	7.03
	15.1	47.5	7.36
	27.2	39.8
