# Supplementary material for: Neutrophil extracellular traps arm DC vaccination against NPM-mutant myeloproliferation
Source: eLife. 2022 Apr 26;11:e69257. doi: 10.7554/eLife.69257 (PMC9068207; doi:10.7554/eLife.69257)
Supplement: Figure 1—source data 2. [file elife-69257-fig1-data2.xlsx]

## Sheet: Foglio1
Sample	group	LIve/CD11b,Freq. of Parent	LIve/CD11b/F4/80+Ly6G+cKit+ Myelobl
1: PBL Sottopop_CT135,2f,59.fcs	WT NET	38.8	25.3
2: PBL Sottopop_CT135,2f,60.fcs	WT NET	41.1	30.0
3: PBL Sottopop_CT135,2f,63.fcs	WT NET	26.7	31.6
4: PBL Sottopop_CT136,2f,81.fcs	NPMc+NET	12.0	10.7
5: PBL Sottopop_CT136,2f,82.fcs	NPMc+NET	26.2	11.1
6: PBL Sottopop_CT136,2f,86.fcs	NPMc+NET	14.0	12.2
7: PBL Sottopop_NPM+,2f,-,2f,1.fcs	CTRL	18.9	18.4
8: PBL Sottopop_NPM+,2f,-,2f,2.fcs	CTRL	22.7	14.7
9: PBL Sottopop_NPM+,2f,-,2f,3.fcs	CTRL	24.4	21.7
