# Supplementary material for: Neutrophil extracellular traps arm DC vaccination against NPM-mutant myeloproliferation
Source: eLife. 2022 Apr 26;11:e69257. doi: 10.7554/eLife.69257 (PMC9068207; doi:10.7554/eLife.69257)
Supplement: Figure 1—source data 3. [file elife-69257-fig1-data3.xls]

## Sheet: Sheet1
					Titration data
ng/ml	OD	OD	media	media-bianco	ng/ml	media-blank
50	3.7055	3.7055	3.7055	3.6555
25	1.818	1.818	1.818	1.768	50	3.65
12.5	1.05	1.05	1.05	1	25	1.7
6.25	0.524	0.524	0.524	0.474	12.5	1
3.3	0.31	0.31	0.31	0.26	6.25	0.474
1.56	0.187	0.187	0.187	0.137	3.3	0.26
					1.56	0.137
bianco	0.05	0.05	0.05	0
	OD	OD-blank	ng/ml
NPMc NET
#432	0.214	0.164	2.057
#602	0.213	0.163	2.042
#605	0.199	0.149	1.843
#615	0.219	0.169	2.13
WT NET
#424	0.091	0.041	0.3
#404	0.118	0.068	0.686
#428	0.126	0.076	0.8
#425	0.165	0.115	1.35714
CTRL NPMc no vax #225	0.093	0.043	0.329
CTRL NPMc no vax #226	0.07	0.02	4.95635e-17
CTRL NPMc no vax #230	0.092	0.042	0.314

## Sheet: Sheet2
14.7675
-0.00911577
