# Supplementary material for: Neutrophil extracellular traps arm DC vaccination against NPM-mutant myeloproliferation
Source: eLife. 2022 Apr 26;11:e69257. doi: 10.7554/eLife.69257 (PMC9068207; doi:10.7554/eLife.69257)
Supplement: Figure 2—source data 1. [file elife-69257-fig2-data1.xlsx]

## Sheet: IF
Title: quantification of infiltrating CD8/NPM contacts.
Mean number of CD8/NPM contact
Field	1	2	3	4	5	Media
CTRL	1.37	2.81	1.4	3.24	0.32	1.828
WT NET	3.04	3.26	1.27	2.32	2.37	2.452
NPMc+ NET	4.19	3.86	3.48	3.36	4.08	3.794
