# Supplementary material for: Neutrophil extracellular traps arm DC vaccination against NPM-mutant myeloproliferation
Source: eLife. 2022 Apr 26;11:e69257. doi: 10.7554/eLife.69257 (PMC9068207; doi:10.7554/eLife.69257)
Supplement: Figure 3—source data 1. [file elife-69257-fig3-data1.xlsx]

## Sheet: Foglio1
Title: Original FACS data
EXP ID	FACS Sample:	live/CD11b gate | Freq. of Parent	live/CD11b gate/CD45.1 | Freq. of Parent	live/CD11b gate/CD45.2 | Freq. of Parent	live/Ckit | Freq. of Parent	live/Ly6G, KIT subset | Freq. of Parent	live/Ly6G, KIT subset/CD45.1 | Freq. of Parent	live/Ly6G, KIT subset/CD45.2 | Freq. of Parent	EXP ID
CT177A	BM_1.fcs	39.8	24.5	73.7	32.6	4.79	19.1	75.2	CT177A
CTRL	BM_2.fcs	83.1	24.3	75.3	50.9	11.6	26.6	69.8	CTRL
	BM_3.fcs	42.9	54.7	42.8	34.5	6.24	48.1	41.5
CT177B	BM_4.fcs	46.8	1.74	97.2	36.3	6.57	0.65	95.8	CT177B
NPMc+NET	BM_5.fcs	43.3	3.4	95	34.1	5.23	1.96	93.1	NPMc+NET
	BM_6.fcs	69.7	1.08	97.8	10.3	3.9	0.35	92.8
	BM_7.fcs	56.5	3.4	95.8	44.6	8.34	1.66	95.5
CT177D	BM_8.fcs	48.5	52	45.9	37.1	5.68	44.9	46.2	CT177D
WT NET	BM_9.fcs	43.2	48.5	49.4	34.3	5.59	38.7	55.2	WT NET
	BM_10.fcs	54.6	5.15	93.6	41.6	7.2	2.63	94.2
	BM_11.fcs	40	4.33	94	29.9	5.69	1.86	91.7
	BM_12.fcs	68	1.02	98.3	52.2	10.4	0.47	97.4
	BM_13.fcs	49.6	37.1	61.1	38.3	6.11	37.4	58.4
