# Supplementary material for: Neutrophil extracellular traps arm DC vaccination against NPM-mutant myeloproliferation
Source: eLife. 2022 Apr 26;11:e69257. doi: 10.7554/eLife.69257 (PMC9068207; doi:10.7554/eLife.69257)
Supplement: Figure 3—source data 2. [file elife-69257-fig3-data2.xlsx]

## Sheet: Foglio1
IHC
				CD8
	Exp ID/histology	1 Campo	2 Campo	3 Campo	4 Campo	5 Campo	Media/row
CTRL	CT 177 A/0	18	19	24	23	35	23.8
	CT 177 A/2	25	32	28	36	26	29.4
	CT 177 A/12	29	26	23	11	30	23.8
	CT 177 A/22	25	33	34	26	35	30.6
NPMc+ NET	CT 177 B/0	65	57	55	68	54	59.8
	CT 177 B/1	85	58	67	37	74	64.2
	CT 177 B/2	115	124	142	137	97	123
	CT 177 B/22	82	106	67	98	60	82.6
WT NETT	CT 177 C/0	10	51	33	28	25	29.4
	CT 177 C/1	55	45	28	13	18	31.8
	CT 177 C/2	51	48	37	49	47	46.4
	CT 177 C/12	69	48	49	33	42	48.2
