# Supplementary material for: Neutrophil extracellular traps arm DC vaccination against NPM-mutant myeloproliferation
Source: eLife. 2022 Apr 26;11:e69257. doi: 10.7554/eLife.69257 (PMC9068207; doi:10.7554/eLife.69257)
Supplement: Figure 4—source data 1. [file elife-69257-fig4-data1.xls]

## Sheet: tumori
	Title: Tumor growth evaluation in vaccinated mice
			day8	day 11	day 14	day 19	day 22	day 26	day8	day 11	day 14	day 19	day 22	day 26
	Group	Mouse ID	minor diameter*major diameter						Tumor Volume (minor diameter)∧2*major diameter
	VAX	I29 42/19 #940	1*2	+	+	+	+	-	2	0	0	0	0	0
		I29-38/19 #287 stock	+	5*5	7*10	7*8	7*8	11*13	0	125	490	392	392	1573
		I29 42/19 #713	2*2	4*7	7*7	10*11	12*13	18*18	8	112	343	1100	1872	5832
		I29-36/19 #886 stock	+	4*5	9*10	9*9	11*11	14*15	0	80	810	729	1331	2940
		I29 42/19 #724	+	+	1*2	+	+	-	0	0	2	0	0	0
	CTRL	I29-36/19 #883 stock	1*2	6*7	6*8	8*12	12*15	17*25	2	252	288	768	2160	7225
		I29 42/19 #945	2*3	5*7	9*10	12*16	15*19	21*26	12	175	810	2304	4275	11466
		I29 42/19 #726		2*3	6*7	10*11	12*15	17*19	0	12	252	1100	2160	5491
		I29 42/19 #720	4*4	7*7	10*12	12*16	15*16	20*24	64	343	1200	2304	3600	9600
