# Supplementary material for: Neutrophil extracellular traps arm DC vaccination against NPM-mutant myeloproliferation
Source: eLife. 2022 Apr 26;11:e69257. doi: 10.7554/eLife.69257 (PMC9068207; doi:10.7554/eLife.69257)
Supplement: Figure 4—source data 2. [file elife-69257-fig4-data2.xlsx]

## Sheet: Source data 2
	Title: FACS data relative to the in vivo cytotoxicity assay
	FACS ID	%CFSE HIgh	%CFSElow	Group		% of lysis
	4 12 19 CTX VIVO 005.fcs	24	75.8	C1498 NPMc		68.3377
	4 12 19 CTX VIVO 006.fcs	21.8	78	VAX DC NPMC NET		72.0513
	4 12 19 CTX VIVO 007.fcs	22.3	77	(VAX)		71.039
	4 12 19 CTX VIVO 008.fcs	22.5	77.4			70.9302
	4 12 19 CTX VIVO 009.fcs	12.9	86.9			85.1554
	4 12 19 CTX VIVO 014.fcs	50	49.8	C1498 NPMc		-0.401606
	4 12 19 CTX VIVO 015.fcs	41.7	58.1	NO vax		28.2272
	4 12 19 CTX VIVO 016.fcs	41.7	57.4	(CTRL)		27.3519
	4 12 19 CTX VIVO 017.fcs	31.1	68.9	No TM		54.8621
	4 12 19 CTX VIVO 018.fcs	29.1	70.8	VAX DC NPMc+ NET		58.8983
	4 12 19 CTX VIVO 019.fcs	29.5	70.4	(no TM+VAX)		58.0966
