# Supplementary material for: Neutrophil extracellular traps arm DC vaccination against NPM-mutant myeloproliferation
Source: eLife. 2022 Apr 26;11:e69257. doi: 10.7554/eLife.69257 (PMC9068207; doi:10.7554/eLife.69257)
Supplement: Figure 4—source data 3. [file elife-69257-fig4-data3.xls]

## Sheet: Volume
		Title: Tumor growth evaluation in mice receiving DC+ NPMc+ NET or DC+ NPMc+ peptides vaccines
		Groups:	Exp ID	Mouse ID	day 6	day 10	day 13	day 17	day 21	day 26	Exp ID	Mouse ID	day 6	day 10	day 13	day 17	day 21	day 26
					(minor diameter)*(major diamater) (mm)								Tumor Volume (minor diameter)∧2*(major diamater) (mm2)
		NPMc+ NET	vx 62	I29-49/19 6/18 2-3-20 #812	3*3	7*7	7*7	5*5	7*8	11*11	vx 62	I29-49/19 6/18 2-3-20 #812	27	343	343	125	392	1331
			vx 62	I29-49/19 6/18 2-3-20 #813	2*2	6*8	6*7	9*10	9*10	9*11	vx 62	I29-49/19 6/18 2-3-20 #813	8	288	252	810	810	891
			vx 62	I29-5/20 6/18 2-3-20 #748		5*6	7*9	10*13	14*16	14*18	vx 62	I29-5/20 6/18 2-3-20 #748	0	150	441	1300	3136	3528
			vx 62	I29-5/20 6/18 2-3-20 #751		3*3	5*5	3*3	-	-	vx 62	I29-5/20 6/18 2-3-20 #751	0	27	125	27	0	0
			vx 62	I29-13/20 #637 stock		2*3	+	+	-	-	vx 62	I29-13/20 #637 stock	0	12	0	0	0	0
		NPMc+ peptides	vx 63	I29-7/20 6/18 2-3-20 #919	1*2	5*5	5*5	7*9	10*11	15*16	vx 63	I29-7/20 6/18 2-3-20 #919	2	125	125	441	1100	3600
			vx 63	I29-10/20 #246 stock	2*2	+	+	+	2*2	2*2	vx 63	I29-10/20 #246 stock	8	0	0	0	8	8
			vx 63	I29-14/20 #793 stock		3*3	5*6	6*7	9*9	14*17	vx 63	I29-14/20 #793 stock	0	27	150	252	729	3332
			vx 63	I29-14/20 #796 stock		4*5	9*10	9*11	13*15	16*20	vx 63	I29-14/20 #796 stock	0	80	810	891	2535	5120
		CTRL	vx 66	I29-7/20 6/18 2-3-20 #920		3*4	7*10	7*8	8*12	15*15	vx 66	I29-7/20 6/18 2-3-20 #920	0	36	490	392	768	3375
			vx 66	I29-12/20 #521 stock		1*2	3*4	5*7	8*10	12*15	vx 66	I29-12/20 #521 stock	0	2	36	175	640	2160
			vx 66	I29-12/20 #523 stock	2*2	7*8	8*9	10*12	11*14	18*22	vx 66	I29-12/20 #523 stock	8	392	576	1200	1694	7128
			vx 66	I29 -16/20#130	2*2	6*6	7*7	7*8	10*14	14*19	vx 66	I29 -16/20#130	8	216	343	392	1400	3724
			vx 66	I29-16/20 #131	2*2	4*4	5*5	7*7	8*10	12*19	vx 66	I29-16/20 #131	8	64	125	343	640	2736
