# Supplementary material for: Neutrophil extracellular traps arm DC vaccination against NPM-mutant myeloproliferation
Source: eLife. 2022 Apr 26;11:e69257. doi: 10.7554/eLife.69257 (PMC9068207; doi:10.7554/eLife.69257)
Supplement: Figure 4—source data 4. [file elife-69257-fig4-data4.xlsx]

## Sheet: Foglio1
Title: quantification of infiltrating CD8 cells by IHC
				CD8
	Fields	1	2	3	3	5
C1498 NPMc 5x10*5 VAX DC NPMc+NET	vx62 #812	30	18	22	33	40
	vx62 #813	20	26	16	21	19
	vx62 #748	23	11	15	8	10
	vx62 #636	30	18	27	22	28
C1498 NPMc 5x10*5 VAX DC NPMc+ peptides	vx63 #919	12	14	13	17	15
	vx63 #246	15	20	10	16	12
	vx63 #793	8	10	9	6	8
	vx63 #796	7	9	10	11	12
C1498 NPMc 5x10*5 CTRL	vx66 #521	10	10	6	8	7
	vx66 #523	5	4	3	3	4
	vx66 #130	13	5	2	3	7
	vx66 #131	2	5	4	3	3
