# Supplementary material for: Neutrophil extracellular traps arm DC vaccination against NPM-mutant myeloproliferation
Source: eLife. 2022 Apr 26;11:e69257. doi: 10.7554/eLife.69257 (PMC9068207; doi:10.7554/eLife.69257)
Supplement: Figure 4—source data 6. [file elife-69257-fig4-data6.xlsx]

## Sheet: Sheet1
	Title: Original FACS data telative to the frequency of GFP+ cells
	Sample group	EXP	Sample ID:	Live/C1498-GFP | Freq. of Parent
	CTRL	EXP1	CTRL_1.fcs	13.7
			CTRL_2.fcs	10.4
			CTRL_3.fcs	10.2
			CTRL_4.fcs	5.6
			CTRL_5.fcs	2.74
			CTRL_7.fcs	7.66
			CTRL_8.fcs	1.91
			CTRL_9.fcs	11.8
			CTRL_26.fcs	29.4
			CTRL_27.fcs	6.54
			CTRL_29.fcs	2.07
		EXP2	CTRL_5.fcs	28.8
			CTRL_2.fcs	7.5
			CTRL_3.fcs	32.4
			CTRL_4.fcs	8.3
	NPMc+ NET	EXP1	NET_18.fcs	3.97
			NET_19.fcs	2.06
			NET_20.fcs	0.85
			NET_21.fcs	3.68
			NET_22.fcs	11.8
			NET_23.fcs	6.05
			NET_24.fcs	4.96
			NET_25.fcs	9.12
			NET_33.fcs	3.37
			NET_35.fcs	2
		EXP2	NET_8.fcs	3.71
			NET_9.fcs	9.33
			NET_10.fcs	11.5
			NET_12.fcs	0.36
			NET_13.fcs	0.79
	NPMc+ peptides	EXP1	PEP_10.fcs	28.4
			PEP_11.fcs	5.93
			PEP_12.fcs	1.24
			PEP_13.fcs	14
			PEP_14.fcs	2.34
			PEP_15.fcs	10
			PEP_16.fcs	2.2
			PEP_17.fcs	24.5
			PEP_30.fcs	27
		EXP2	PEP_21.fcs	1.97
			PEP_14.fcs	3.89
			PEP_15.fcs	0.4
			PEP_16.fcs	0.15
			PEP_17.fcs	4.65
			PEP_18.fcs	0.17
