# Supplementary material for: Neutrophil extracellular traps arm DC vaccination against NPM-mutant myeloproliferation
Source: eLife. 2022 Apr 26;11:e69257. doi: 10.7554/eLife.69257 (PMC9068207; doi:10.7554/eLife.69257)
Supplement: Figure 4—source data 7. [file elife-69257-fig4-data7.xlsx]

## Sheet: Sheet1
Tite: Original FACS data relative to the frequency of CD8+ cells (CD3 gate)
Sample group	EXP	Sample ID:	Live/CD3+/CD8+ | Freq. of Parent
CTRL	EXP1	CTRL_1.fcs	48.3
		CTRL_2.fcs	59.5
		CTRL_3.fcs	57.2
		CTRL_4.fcs	67.3
		CTRL_5.fcs	54.1
		CTRL_6.fcs	54.6
		CTRL_7.fcs	49.5
		CTRL_8.fcs	44.2
		CTRL_9.fcs	61.4
		CTRL_26.fcs	61.5
		CTRL_27.fcs	48.6
		CTRL_28.fcs	40.6
		CTRL_29.fcs	34
	EXP2	CTRL_1.fcs	75,5
		CTRL_2.fcs	65,4
NPMc+ NET	EXP1	NET_18.fcs	68.2
		NET_19.fcs	43.9
		NET_20.fcs	50.3
		NET_21.fcs	46.9
		NET_22.fcs	61.1
		NET_23.fcs	64.2
		NET_24.fcs	54.5
		NET_25.fcs	78
		NET_33.fcs	40.4
		NET_34.fcs	65.5
		NET_35.fcs	34.9
	EXP2	NET_6.fcs	54.2
		NET_7.fcs	80,4
		NET_8.fcs	70,3
		NET_9.fcs	58,4
NPMc+ peptides	EXP1	PEP_10.fcs	63.8
		PEP_11.fcs	52.1
		PEP_12.fcs	47.5
		PEP_13.fcs	60
		PEP_14.fcs	54.7
		PEP_15.fcs	50.7
		PEP_16.fcs	81.1
		PEP_17.fcs	57
		PEP_30.fcs	53.6
		PEP_31.fcs	49.6
		PEP_32.fcs	37.8
	EXP2	PEP_14.fcs	67,2
		PEP_15.fcs	61,7
		PEP_16.fcs	54,2
		PEP_17.fcs	71,5
