# Supplementary material for: Neutrophil extracellular traps arm DC vaccination against NPM-mutant myeloproliferation
Source: eLife. 2022 Apr 26;11:e69257. doi: 10.7554/eLife.69257 (PMC9068207; doi:10.7554/eLife.69257)
Supplement: Figure 4—source data 8. [file elife-69257-fig4-data8.xlsx]

## Sheet: Sheet1
Original FACS data relative to the frequency of Ki-67+/CD8 cells
Sample group	Sample ID:	Live/CD3+/CD8+/KI67+ | Freq. of Parent
CTRL	CTRL_1.fcs	30.7
	CTRL_2.fcs	46.3
	CTRL_3.fcs	47
	CTRL_4.fcs	29.1
	CTRL_5.fcs	17.3
	CTRL_6.fcs	17.6
	CTRL_7.fcs	29.2
	CTRL_8.fcs	27.9
	CTRL_9.fcs	29.5
	CTRL_26.fcs	50.1
	CTRL_27.fcs	40.5
	CTRL_28.fcs	29.5
	CTRL_29.fcs	33.2
NPMc+ NET	NET_18.fcs	49.8
	NET_19.fcs	35.3
	NET_20.fcs	32.9
	NET_21.fcs	50.4
	NET_22.fcs	42.6
	NET_23.fcs	52.3
	NET_24.fcs	49
	NET_25.fcs	44.7
	NET_33.fcs	44
	NET_34.fcs	48.8
	NET_35.fcs	60.5
NPMc+ peptides	PEP_10.fcs	35.7
	PEP_11.fcs	25.8
	PEP_12.fcs	28.6
	PEP_13.fcs	39.7
	PEP_14.fcs	35.4
	PEP_15.fcs	37
	PEP_16.fcs	41
	PEP_17.fcs	34.1
	PEP_30.fcs	40.4
	PEP_31.fcs	39.7
	PEP_32.fcs	29
