# Supplementary material for: Neutrophil extracellular traps arm DC vaccination against NPM-mutant myeloproliferation
Source: eLife. 2022 Apr 26;11:e69257. doi: 10.7554/eLife.69257 (PMC9068207; doi:10.7554/eLife.69257)
Supplement: Figure 4—source data 9. [file elife-69257-fig4-data9.xlsx]

## Sheet: Sheet1
Original FACS data relative to the frequency of OX40+ cells (CD8 gate)
Sample group	EXP	Sample:	Live/CD3+/CD8+/OX40+ | Freq. of Parent
CTRL	EXP 1	CTRL_1.fcs	14.9
		CTRL_2.fcs	25.1
		CTRL_3.fcs	33.6
		CTRL_4.fcs	29.4
		CTRL_5.fcs	28.1
		CTRL_6.fcs	32.6
		CTRL_7.fcs	27.6
		CTRL_8.fcs	25.4
		CTRL_9.fcs	30.2
		CTRL_26.fcs	32.4
		CTRL_27.fcs	34.7
		CTRL_28.fcs	31.4
		CTRL_29.fcs	32.3
	EXP 2	CTRL_1.fcs	12.3
		CTRL_2.fcs	26.9
		CTRL_3.fcs	69.1
		CTRL_4.fcs	44.7
NPMc+ NET	EXP 1	NET_18.fcs	36.7
		NET_19.fcs	40.4
		NET_20.fcs	36.7
		NET_21.fcs	36
		NET_22.fcs	29.1
		NET_23.fcs	33.3
		NET_24.fcs	45.1
		NET_25.fcs	35.8
		NET_33.fcs	38.7
		NET_34.fcs	30
		NET_35.fcs	33.1
	EXP2	NET_6.fcs	33.1
		NET_7.fcs	46
		NET_8.fcs	52.9
		NET_9.fcs	50.6
		NET_10.fcs	60.8
		NET_11.fcs	59.1
		NET_12.fcs	61.5
		NET_13.fcs	37.8
NPMc+ peptides	EXP1	PEP_10.fcs	34.9
		PEP_11.fcs	30.6
		PEP_12.fcs	42.4
		PEP_13.fcs	40.8
		PEP_14.fcs	45.5
		PEP_15.fcs	40.4
		PEP_16.fcs	29.6
		PEP_17.fcs	31.6
		PEP_30.fcs	35.8
		PEP_31.fcs	31.5
		PEP_32.fcs	31.5
	EXP2	PEP_14.fcs	48.2
		PEP_15.fcs	27.2
		PEP_16.fcs	22.8
		PEP_17.fcs	51.2
		PEP_18.fcs	26.7
		PEP_19.fcs	64.1
		PEP_20.fcs	72.6
		PEP_21.fcs	42.4
