# Supplementary material for: Neutrophil extracellular traps arm DC vaccination against NPM-mutant myeloproliferation
Source: eLife. 2022 Apr 26;11:e69257. doi: 10.7554/eLife.69257 (PMC9068207; doi:10.7554/eLife.69257)
Supplement: Figure 4—source data 10. [file elife-69257-fig4-data10.xlsx]

## Sheet: Sheet1
FACS data relative to the frequency of PD1+TIM3+LAG3+ on CD8 cells
Sample group	Sample:	Live/CD3+/CD8+/PD1/Q2: TIM3+ , LAG3+ | Freq. of Parent
CTRL	CTRL_1.fcs	42.7
	CTRL_2.fcs	12.9
	CTRL_3.fcs	55.9
	CTRL_4.fcs	8.4
	CTRL_5.fcs	60.8
	CTRL_6.fcs	68
	CTRL_7.fcs	65.1
	CTRL_8.fcs	58.5
	CTRL_9.fcs	59.2
	CTRL_26.fcs	57.4
	CTRL_27.fcs	42.7
	CTRL_28.fcs	13.6
	CTRL_29.fcs	69.8
NPMc+ NET	NET_18.fcs	11.6
	NET_19.fcs	42.9
	NET_20.fcs	27.6
	NET_21.fcs	30.5
	NET_22.fcs	41.6
	NET_23.fcs	31.8
	NET_24.fcs	10.9
	NET_25.fcs	28.4
	NET_33.fcs	12.2
	NET_34.fcs	12.9
	NET_35.fcs	48.5
NPMc+ peptides	PEP_10.fcs	67.1
	PEP_11.fcs	56.7
	PEP_12.fcs	31.7
	PEP_13.fcs	20.9
	PEP_14.fcs	20.5
	PEP_15.fcs	30.2
	PEP_16.fcs	8.3
	PEP_17.fcs	19.7
	PEP_30.fcs	23.5
	PEP_31.fcs	46.4
	PEP_32.fcs	3.36
