# Supplementary material for: Neutrophil extracellular traps arm DC vaccination against NPM-mutant myeloproliferation
Source: eLife. 2022 Apr 26;11:e69257. doi: 10.7554/eLife.69257 (PMC9068207; doi:10.7554/eLife.69257)
Supplement: Figure 4—source data 11. [file elife-69257-fig4-data11.xlsx]

## Sheet: Sheet1
Original FACS data relative to the frequency of TNF+ cells (on CD8+)
Sample group	EXP	Sample:	Live/CD3+/CD8+/TNFA+ | Freq. of Parent
CTRL	EXP1	CTRL_1.fcs	12.1
		CTRL_2.fcs	8.7
		CTRL_3.fcs	24.9
		CTRL_4.fcs	5.93
		CTRL_5.fcs	10.7
		CTRL_6.fcs	10.5
		CTRL_7.fcs	16.6
		CTRL_8.fcs	15.5
		CTRL_9.fcs	14.3
		CTRL_26.fcs	8.58
		CTRL_27.fcs	19.1
		CTRL_28.fcs	27.8
		CTRL_29.fcs	21.5
	EXP2	CTRL_1.fcs	10.4
		CTRL_2.fcs	18.7
		CTRL_3.fcs	21.5
		CTRL_4.fcs	36.7
NPMc+ NET	EXP1	NET_18.fcs	14.9
		NET_19.fcs	32.2
		NET_20.fcs	33.2
		NET_21.fcs	37.8
		NET_22.fcs	25.1
		NET_23.fcs	21.4
		NET_24.fcs	16.3
		NET_25.fcs	18
		NET_33.fcs	33.1
		NET_34.fcs	8.34
		NET_35.fcs	45
	EXP2	NET_6.fcs	17.6
		NET_7.fcs	10.2
		NET_8.fcs	23.6
		NET_9.fcs	29.4
		NET_10.fcs	33.7
		NET_11.fcs	22.3
		NET_12.fcs	17.6
		NET_13.fcs	23.4
NPMc+ peptides	EXP1	PEP_10.fcs	11.4
		PEP_11.fcs	26.9
		PEP_12.fcs	30.7
		PEP_13.fcs	20.1
		PEP_14.fcs	31.7
		PEP_15.fcs	27.1
		PEP_16.fcs	19.2
		PEP_17.fcs	15.6
		PEP_30.fcs	18.8
		PEP_31.fcs	4.95
		PEP_32.fcs	34.4
	EXP2	PEP_14.fcs	26.6
		PEP_15.fcs	25.3
		PEP_16.fcs	19.1
		PEP_17.fcs	15.3
		PEP_18.fcs	11.3
		PEP_19.fcs	16.9
		PEP_20.fcs	16.9
		PEP_21.fcs	13.7
