# Supplementary material for: Neutrophil extracellular traps arm DC vaccination against NPM-mutant myeloproliferation
Source: eLife. 2022 Apr 26;11:e69257. doi: 10.7554/eLife.69257 (PMC9068207; doi:10.7554/eLife.69257)
Supplement: Figure 4—source data 12. [file elife-69257-fig4-data12.xlsx]

## Sheet: Sheet1
Title: Original FACS data relative to the frequency of IFNg+ cells (on CD8+)
Sample group	EXP	Sample:	Live/CD3+/CD8+/IFNG+ | Freq. of Parent
CTRL	EXP 1	CTRL_1.fcs	9.96
		CTRL_2.fcs	2.59
		CTRL_3.fcs	7.87
		CTRL_4.fcs	1.66
		CTRL_5.fcs	24.1
		CTRL_6.fcs	20
		CTRL_7.fcs	16
		CTRL_8.fcs	24.3
		CTRL_9.fcs	13.5
		CTRL_26.fcs	10.2
		CTRL_27.fcs	10.6
		CTRL_28.fcs	23.7
		CTRL_29.fcs	24.7
	EXP2	CTRL_1.fcs	48.6
		CTRL_2.fcs	36.4
		CTRL_3.fcs	41.1
NPMc+ NET	EXP1	NET_18.fcs	3.32
		NET_19.fcs	30.4
		NET_20.fcs	39.9
		NET_21.fcs	23.6
		NET_22.fcs	24.1
		NET_23.fcs	8.61
		NET_24.fcs	4.92
		NET_25.fcs	9.13
		NET_33.fcs	17.9
		NET_34.fcs	8
		NET_35.fcs	29.8
	EXP2	NET_6.fcs	37.7
		NET_7.fcs	17.3
		NET_8.fcs	49.4
		NET_9.fcs	49.8
		NET_10.fcs	46
		NET_11.fcs	32.2
		NET_12.fcs	39.6
		NET_13.fcs	47.2
NPMc+ peptides	EXP 1	PEP_10.fcs	14.7
		PEP_11.fcs	40.6
		PEP_12.fcs	41.3
		PEP_13.fcs	9.62
		PEP_14.fcs	31.6
		PEP_15.fcs	24
		PEP_16.fcs	4.91
		PEP_17.fcs	15.4
		PEP_30.fcs	18.9
		PEP_31.fcs	8.1
		PEP_32.fcs	51.3
	EXP2	PEP_14.fcs	41.8
		PEP_15.fcs	37.2
		PEP_16.fcs	43.2
		PEP_17.fcs	33.4
		PEP_18.fcs	26.9
		PEP_19.fcs	25.4
		PEP_20.fcs	37.8
		PEP_21.fcs	48.8
