# Supplementary material for: Neutrophil extracellular traps arm DC vaccination against NPM-mutant myeloproliferation
Source: eLife. 2022 Apr 26;11:e69257. doi: 10.7554/eLife.69257 (PMC9068207; doi:10.7554/eLife.69257)
Supplement: Figure 4—source data 13. [file elife-69257-fig4-data13.xlsx]

## Sheet: Sheet1
		MORFOLOGICO/CD3+/CD8+/CCR7-/CD44+ CD62L- EFFECTOR MEMORY | Freq. of Parent
	CTRL_1.fcs	26.2
FACS data relative to the frequency of Tem (on CD8+)
	Sample	% of TEM (CCR7-CD62L-CD44+)
control	CTRL_2.fcs	13.8
	CTRL_3.fcs	23.4
	CTRL_4.fcs	22.9
	CTRL_5.fcs	36.8
	CTRL_6.fcs	50.7
	CTRL_7.fcs	24
	CTRL_8.fcs	22.3
	CTRL_9.fcs	30.2
	CTRL_26.fcs	38.5
	CTRL_27.fcs	27.9
	CTRL_28.fcs	27.8
	CTRL_29.fcs	49.1
NPMc+ NET	NET_18.fcs	34.5
	NET_19.fcs	37.3
	NET_20.fcs	34.8
	NET_21.fcs	28.2
	NET_22.fcs	45.4
	NET_23.fcs	41.4
	NET_24.fcs	46.2
	NET_25.fcs	25.9
	NET_33.fcs	32.6
	NET_34.fcs	22.9
	NET_35.fcs	22.5
NPMc+ peptides	PEP_10.fcs	44.5
	PEP_11.fcs	29.2
	PEP_12.fcs	19
	PEP_13.fcs	18.6
	PEP_14.fcs	36.4
	PEP_15.fcs	18.8
	PEP_16.fcs	19.1
	PEP_17.fcs	33.9
	PEP_30.fcs	36.4
	PEP_31.fcs	26.2
	PEP_32.fcs	25.6
