# Supplementary material for: Neutrophil extracellular traps arm DC vaccination against NPM-mutant myeloproliferation
Source: eLife. 2022 Apr 26;11:e69257. doi: 10.7554/eLife.69257 (PMC9068207; doi:10.7554/eLife.69257)
Supplement: Figure 4—source data 14. [file elife-69257-fig4-data14.xlsx]

## Sheet: Foglio1
ELISA Ab to NPM
	OD450	mouse #	Group	OD ratio
	0.1758	#949 ep	ctrl	1.6384
	0.1077	#950 ep	ctrl	1.00373
	0.1042	#952 ep	ctrl	0.971109
	0.1159	#976 ep	ctrl	1.08015
	0.1137	#944 ep	ctrl	1.05965
	0.1593	#946 ep	ctrl	1.48462
	0.4854	#955 ep	NPMc+ peptides	4.52377
	0.8457	#956 ep	NPMc+ peptides	7.88164
	0.6593	#957 ep	NPMc+ peptides	6.14445
	0.1164	#977 ep	ctrl	1.08481
	0.1087	#978 ep	ctrl	1.01305
	0.165	#945 ep	ctrl	1.53774
	0.188	#943 ep	ctrl	1.7521
	0.5162	#959 ep	NPMc+ NET	4.81081
	0.4515	#962 ep	NPMc+ NET	4.20783
	0.5385	#966 ep	NPMc+ NET	5.01864
	1.0039	#967 ep	NPMc+ NET	9.35601
	0.6243	#968 ep	NPMc+ NET	5.81827
	0.4545	#144 ep	NPMc+ NET	4.23579
	0.407	#146 ep	NPMc+ NET	3.7931
	0.7526	#147 ep	NPMc+ NET	7.01398
	0.7041	#961 ep	NPMc+ NET	6.56198
	0.6575	#963 ep	NPMc+ NET	6.12768
	0.5284	#145 ep	NPMc+ NET	4.92451
	0.7922	#969 ep	NPMc+ peptides	7.38304
	0.4261	#970 ep	NPMc+ peptides	3.97111
	0.7705	#973 ep	NPMc+ peptides	7.1808
	0.5679	#148 ep	NPMc+ peptides	5.29264
	0.7918	#150 ep	NPMc+ peptides	7.37931
	0.5352	#151 ep	NPMc+ peptides	4.98788
	0.6218	#152 ep	NPMc+ peptides	5.79497
	0.8409	#971 ep	NPMc+ peptides	7.83691
	0.595	#972 ep	NPMc+ peptides	5.5452
	0.1534	B6 #239	B6 #239	1.42964
	0.2126	B6 #240	B6 #240	1.98136
	0.1153	0.0993	blank	media	0.1073
