# Supplementary material for: Neutrophil extracellular traps arm DC vaccination against NPM-mutant myeloproliferation
Source: eLife. 2022 Apr 26;11:e69257. doi: 10.7554/eLife.69257 (PMC9068207; doi:10.7554/eLife.69257)
Supplement: Figure 4—source data 15. [file elife-69257-fig4-data15.xls]

## Sheet: Sheet1
		mouse Ab MPO 28/01/22
Titration							sample dil: 1:200		OD sample	pg/ml		0.0754
pg/ml
							0.0867			61.0811	ctrl	#949 ep
							0.1029			148.649	ctrl	#950 ep
5	0.2137	0.2623	0.238				undet			#VALUE!	ctrl	#952 ep
2.5	0.1227	0.1952	0.15895	Blank	0.0814	0.0694	0.1028			148.108	ctrl	#976 ep
1.25	0.065	0.0989	0.08195				0.1294			291.892	ctrl	#944 ep
0.625	0.0825	0.1153	0.0989				0.1017			142.162	ctrl	#946 ep
0.312	0.0767	0.0803	0.0785				0.1097			185.405	NPMc+ peptides	#955 ep
0.156	0	0.0909	0.04545				0.0962			112.432	NPMc+ peptides	#956 ep
0.78	0.0907	0.0715	0.0811				0.1078			175.135	NPMc+ peptides	#957 ep
							0.0983			123.784	ctrl	#977 ep
							0.1707			515.135	ctrl	#978 ep
							0.1203			242.703	ctrl	#945 ep
							0.0946			103.784	ctrl	#943 ep
							0.1848			591.351	NPMc+ NET	#959 ep
							0.1766			547.027	NPMc+ NET	#962 ep
							0.1056			163.243	NPMc+ NET	#966 ep
							0.1346			320	NPMc+ NET	#967 ep
							0.1005			135.676	NPMc+ NET	#968 ep
							0.3504			1486.49	NPMc+ NET	#144 ep
							0.154			424.865	NPMc+ NET	#146 ep
							0.2164			762.162	NPMc+ NET	#147 ep
							0.3989			1748.65	NPMc+ NET	#961 ep
							0.1429			364.865	NPMc+ NET	#963 ep
							0.1229			256.757	NPMc+ NET	#145 ep
							0.0999			132.432	NPMc+ peptides	#969 ep
							0.1299			294.595	NPMc+ peptides	#970 ep
							0.1459			381.081	NPMc+ peptides	#973 ep
							0.1398			348.108	NPMc+ peptides	#148 ep
							0.1133			204.865	NPMc+ peptides	#150 ep
							0.1831			582.162	NPMc+ peptides	#151 ep
							0.1351			322.703	NPMc+ peptides	#152 ep
							0.1368			331.892	NPMc+ peptides	#972 ep
							0.086			57.2973	no TM	B6 #238
							0.1236			260.541	no TM	B6 #239
							0.0824			37.8378	no TM	B6 #240

## Sheet: Sheet2
OD450	mouse #	Group	OD ratio
0.1758	#949 ep	ctrl	1.6384			0.0871	#949 ep	No vax	1.2311	OD automatico
0.1077	#950 ep	ctrl	1.00373			0.0617	#950 ep	No vax	0.872085
0.1042	#952 ep	ctrl	0.971109			0.0595	#952 ep	No vax	0.840989
0.1159	#976 ep	ctrl	1.08015			0.0563	#976 ep	No vax	0.79576
0.1137	#944 ep	ctrl	1.05965			0.0573	#944 ep	no vax	0.809894
0.1593	#946 ep	ctrl	1.48462			0.0682	#946 ep	no vax	0.963958
0.4854	#955 ep	NPMc+ peptides	4.52377			0.1276	#955 ep	DC pept	1.80353
0.8457	#956 ep	NPMc+ peptides	7.88164			0.1948	#956 ep	DC pept	2.75336
0.6593	#957 ep	NPMc+ peptides	6.14445			0.1544	#957 ep	DC pept	2.18233
0.1164	#977 ep	ctrl	1.08481			0.0639	#977 ep	ctrl	0.90318
0.1087	#978 ep	ctrl	1.01305			0.0582	#978 ep	ctrl	0.822615
0.165	#945 ep	ctrl	1.53774			0.0668	#945 ep	ctrl	0.94417
0.188	#943 ep	ctrl	1.7521			0.0725	#943 ep	ctrl	1.02473
0.5162	#959 ep	NPMc+ NET	4.81081			0.1298	#959 ep	DC + NET	1.83463
0.4515	#962 ep	NPMc+ NET	4.20783			0.1211	#962 ep	DC + NET	1.71166
0.5385	#966 ep	NPMc+ NET	5.01864			0.1427	#966 ep	DC + NET	2.01696
1.0039	#967 ep	NPMc+ NET	9.35601			0.2227	#967 ep	DC + NET	3.1477
0.6243	#968 ep	NPMc+ NET	5.81827			0.1519	#968 ep	DC + NET	2.147
0.4545	#144 ep	NPMc+ NET	4.23579			0.1256	#144 ep	DC + NET	1.77527
0.407	#146 ep	NPMc+ NET	3.7931			0.109	#146 ep	DC + NET	1.54064
0.7526	#147 ep	NPMc+ NET	7.01398			0.1682	#147 ep	DC + NET	2.37739
0.7041	#961 ep	NPMc+ NET	6.56198			0.1611	#961 ep	DC + NET	2.27703
0.6575	#963 ep	NPMc+ NET	6.12768			0.1527	#963 ep	DC + NET	2.1583
0.5284	#145 ep	NPMc+ NET	4.92451			0.1362	#145 ep	DC+ NET	1.92509
0.7922	#969 ep	NPMc+ peptides	7.38304			0.1837	#969 ep	DC pept	2.59647
0.4261	#970 ep	NPMc+ peptides	3.97111			0.1267	#970 ep	DC pept	1.79081
0.7705	#973 ep	NPMc+ peptides	7.1808			0.1731	#973 ep	DC pept	2.44664
0.5679	#148 ep	NPMc+ peptides	5.29264			0.1349	#148 ep	DC pept	1.90671
0.7918	#150 ep	NPMc+ peptides	7.37931			0.1782	#150 ep	DC pept	2.51873
0.5352	#151 ep	NPMc+ peptides	4.98788			0.131	#151 ep	DC pept	1.85159
0.6218	#152 ep	NPMc+ peptides	5.79497			0.1492	#152 ep	DC pept	2.10883
0.8409	#971 ep	NPMc+ peptides	7.83691			0.1922	#971 ep	DC pept	2.71661
0.595	#972 ep	NPMc+ peptides	5.5452			0.143	#972 ep	DC pept	2.0212
0.1534	B6 #239	B6 #239	1.42964			0.0705	B6 #239	B6 #239	0.996466
0.2126	B6 #240	B6 #240	1.98136			0.0768	B6 #240	B6 #240	1.08551
0.1153	0.0993	blank	media	0.1073		0.069	0.0725	blank	media	0.07075
